# Supplementary material
Source: PubMed Central journal article supplement (PMC1941339)
Supplement: pnas_0703144104_1.pdf [file pnas_0703144104_1.pdf]

**Table 1. Penetrance of Transformation Phenotypes  
among 100 flies of  $\Delta 1-2$**

|                                                |            | <b>Heterozygotes</b> | <b>Homozygotes</b> |
|------------------------------------------------|------------|----------------------|--------------------|
| Gain of Function                               |            | 64                   | 98                 |
| Wild Type                                      |            | 36                   | 2                  |
| <b>Wing</b>                                    |            |                      |                    |
| Anterior wing to haltere                       | One side   | 6                    | 4                  |
|                                                | Both sides | 0                    | 1                  |
| Posterior wing to haltere                      | One side   | 7                    | 7                  |
|                                                | Both sides | 0                    | 0                  |
| Reduced allula                                 | One side   | 20                   | 19                 |
|                                                | Both sides | 1                    | 5                  |
| Reduced wing                                   | One side   | 19                   | 22                 |
|                                                | Both sides | 4                    | 7                  |
| <b>Thorax (dorsal, lateral, ventral)</b>       |            |                      |                    |
| Notum reduced-altered                          |            | 1                    | 2                  |
| Groove between T3 and A1                       |            | 43                   | 29                 |
| Ectopic A1 tergite tissue<br>between T3 and A1 | One side   | 12                   | 26                 |
|                                                | Both sides | 1                    | 10                 |
| Ectopic A1, T3 missing,<br>A1 enlarged         | One side   | 1                    | 3                  |
|                                                | Both sides | 0                    | 0                  |
| Ectopic A1, T3 missing,<br>A1 normal size      | One side   | 0                    | 4                  |
|                                                | Both sides | 0                    | 8                  |
| Sternopleural region pale/<br>transformed      | One side   | 4                    | 18                 |
|                                                | Both sides | 1                    | 4                  |
| Sternopleural hairs<br>reduced/curved          | One side   | 9                    | 27                 |
|                                                | Both sides | 1                    | 10                 |
| Hypo-pleural region<br>transformed/missing     | One side   | 32                   | 12                 |
|                                                | Both sides | 9                    | 85                 |
| Halteres missing/reduced                       | One side   | 1                    | 6                  |
|                                                | Both sides | 0                    | 3                  |
| Third leg missing or<br>reduced                | One side   | 0                    | 3                  |
|                                                | Both sides | 0                    | 0                  |
